# Supplementary material
Source: PubMed Central journal article supplement (PMC4556553)
Supplement: NIHMS713098-supplement.pdf [file NIHMS713098-supplement.pdf]

*Supporting Information*

**Hydrophilic Packaging of Iron Oxide Nanoclusters for Highly  
Sensitive Imaging**

*Cartney E. Smith, Dawn Ernenwein, Artem Shkumatov,  
Nicholas Clay, JuYeon Lee, Molly Melhem, Sanjay Misra,  
Steven C. Zimmerman, and Hyunjoon Kong*

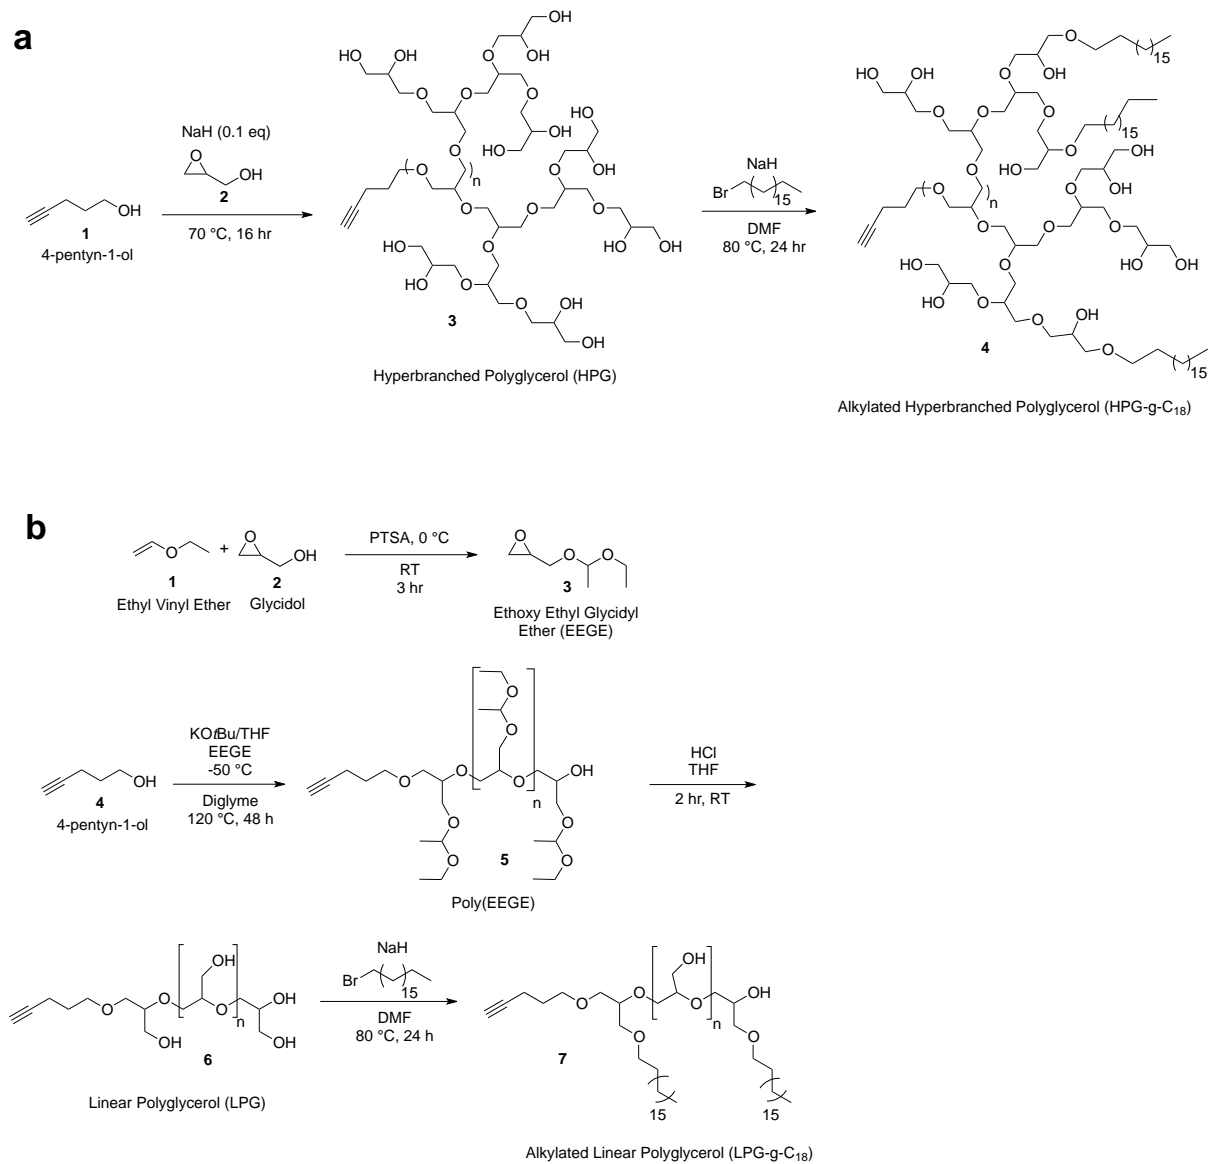

**Figure S1.** Synthesis of (a) alkylated HPG and (b) alkylated LPG.

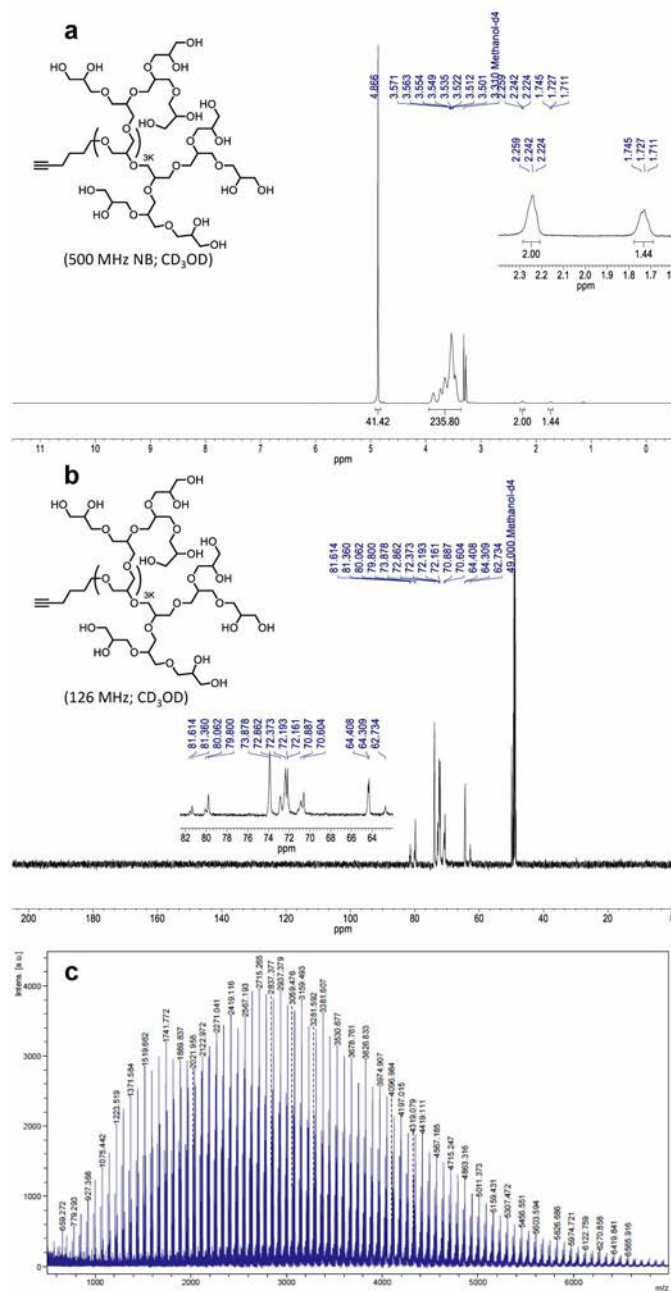

**Figure S2.** Characterization of HPG<sub>3k</sub> by (a) <sup>1</sup>H NMR, (b) <sup>13</sup>C NMR, and (c) MALDI-TOF. HPG<sub>3k</sub> represents HPG with a molecular weight (MW) of 3,000 g/mol. <sup>1</sup>H NMR (400 MHz, methanol-*d*<sub>4</sub>) δ 4.87 (s, 41H), 3.94 – 3.37 (m, 236H), 2.24 (t, *J* = 7.0 Hz, 2H), 1.78 – 1.69 (m, 1H). <sup>13</sup>C NMR (126 MHz, methanol-*d*<sub>4</sub>) δ 81.61, 81.36, 80.06, 79.80, 73.88, 72.86, 72.37, 72.19, 72.16, 70.89, 70.60, 64.41, 64.31, 62.73. MS (MALDI) *m/z* ~3000, peak separation 74 *m/z* units.

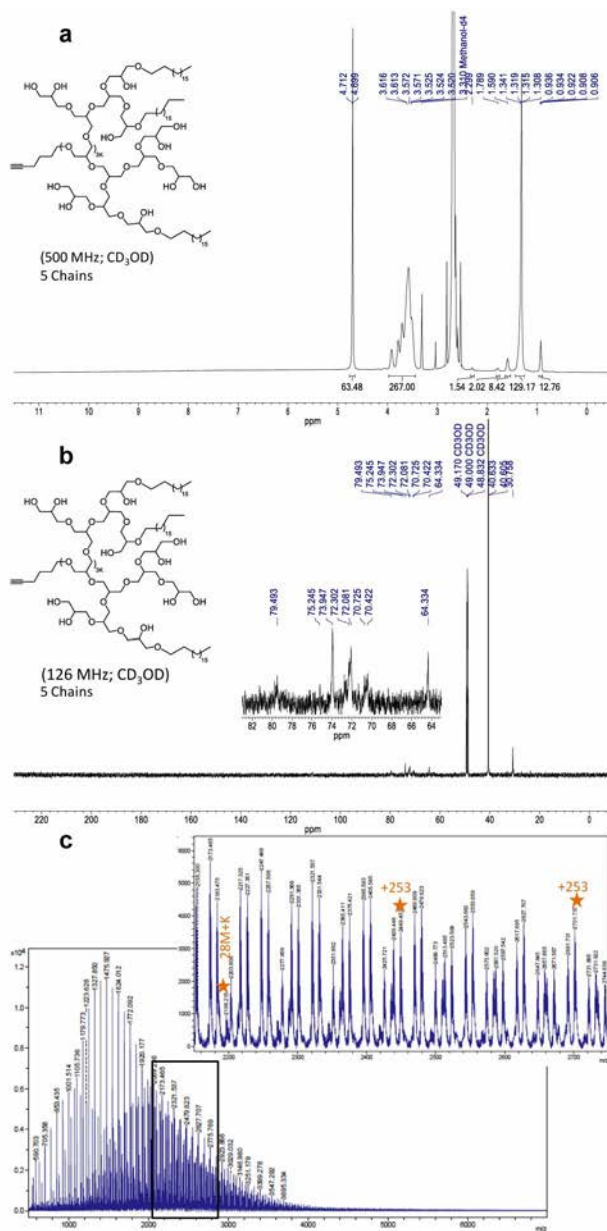

**Figure S3.** Characterization of HPG<sub>3k</sub>-g-C<sub>18</sub>(5) by **(a)** <sup>1</sup>H NMR, **(b)** <sup>13</sup>C NMR, and **(c)** MALDI-TOF. Protons of the C<sub>18</sub> chain are from 1-2 ppm in the <sup>1</sup>H NMR spectrum. HPG<sub>3k</sub>-g-C<sub>18</sub>(5) represents HPG (MW ~3,000 g/mol) substituted with 5 C<sub>18</sub> chains. <sup>1</sup>H NMR (500 MHz, methanol-*d*<sub>4</sub>) δ 4.71 (d, *J* = 6.6 Hz, 63H), 3.97 – 3.44 (m, 267H), 2.30 (s, 2H), 1.79 (s, 2H), 1.59 (s, 8H), 1.43 – 1.25 (m, 129H), 0.96 – 0.89 (m, 13H). <sup>13</sup>C NMR (126 MHz, methanol-*d*<sub>4</sub>) δ 79.49, 73.95, 72.30, 72.08, 70.73, 70.42, 64.33, 40.63, 40.61, 30.76. MS (MALDI) peak separation 253 m/z units.

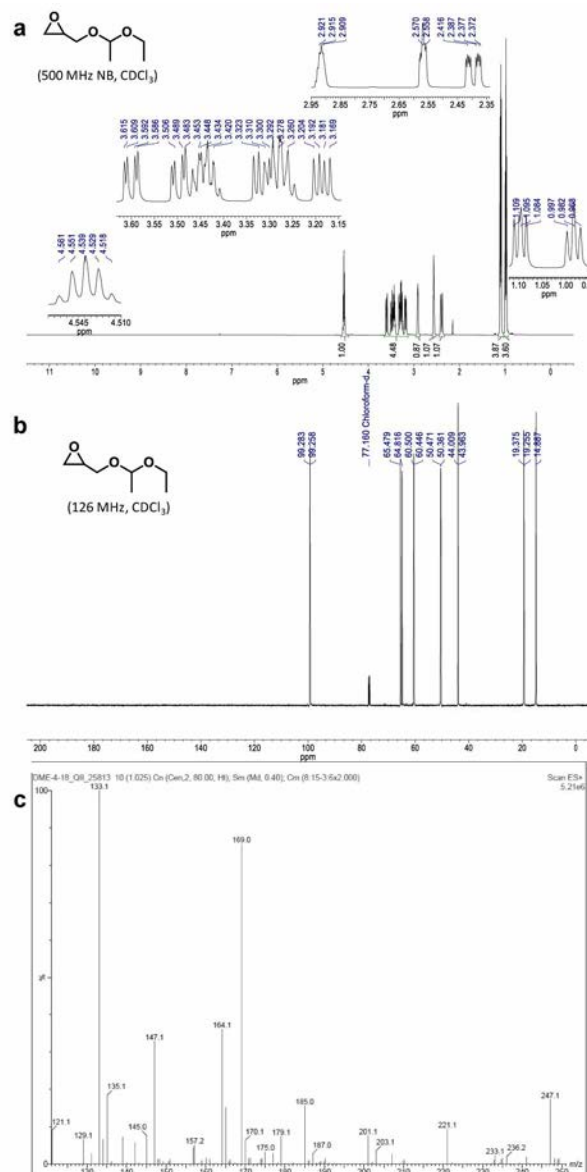

**Figure S4.** Characterization of EEGE, an LPG synthetic intermediate, by (a)  $^1\text{H}$  NMR, (b)  $^{13}\text{C}$  NMR, and (c) ESI mass spectrometry, calculated 146 m/z, experimental 147.1 (M+1), 169.0 m/z (M+Na).  $^1\text{H}$  NMR (500 MHz, chloroform-*d*)  $\delta$  4.58 – 4.49 (m, 1H), 3.64 – 3.14 (m, 5H), 2.95 – 2.88 (m, 1H), 2.57 (ddt,  $J = 5.9, 3.1, 1.5$  Hz, 1H), 2.43 – 2.35 (m, 1H), 1.10 (ddd,  $J = 6.5, 5.4, 1.1$  Hz, 4H), 0.98 (tt,  $J = 7.1, 1.3$  Hz, 4H).  $^{13}\text{C}$  NMR (126 MHz, chloroform-*d*)  $\delta$  99.28, 99.26, 65.48, 64.82, 60.50, 60.45, 50.47, 50.36, 44.01, 43.96, 19.37, 19.25, 14.89.

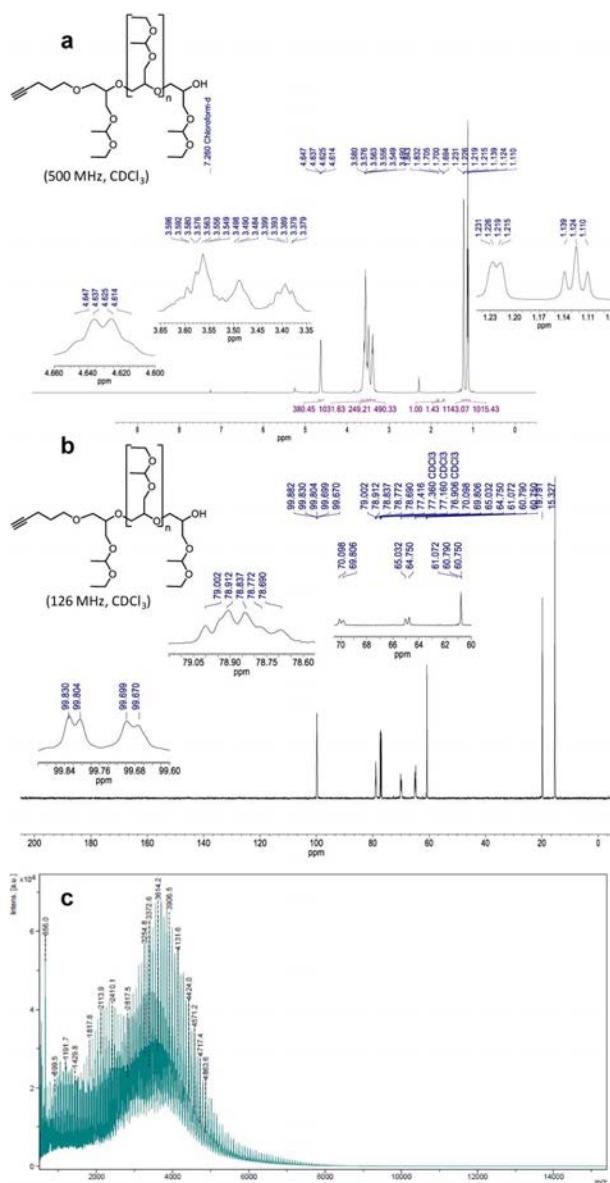

**Figure S5.** Characterization of poly(EEGE), an LPG synthetic intermediate, by (a)  $^1\text{H}$  NMR, (b)  $^{13}\text{C}$  NMR, and (c) MALDI-TOF.  $^1\text{H}$  NMR (500 MHz, chloroform-*d*)  $\delta$  4.63 (q,  $J = 5.5$  Hz, 380H), 3.65 – 3.51 (m, 1032H), 3.49 (q,  $J = 4.2$  Hz, 249H), 3.44 – 3.34 (m, 490H), 1.84 (d,  $J = 5.6$  Hz, 1H), 1.70 (t,  $J = 2.6$  Hz, 1H), 1.26 – 1.18 (m, 1143H), 1.12 (t,  $J = 7.1$  Hz, 1015H).  $^{13}\text{C}$  NMR (126 MHz,  $\text{CDCl}_3$ )  $\delta$  99.88, 99.83, 99.80, 99.70, 99.67, 79.00, 78.91, 78.84, 78.77, 78.69, 77.42, 70.10, 69.81, 65.03, 64.75, 62.38, 61.07, 61.02, 60.79, 60.75, 19.79, 15.33. MS (MALDI) 3600 m/z, peak separation of 147 m/z units.

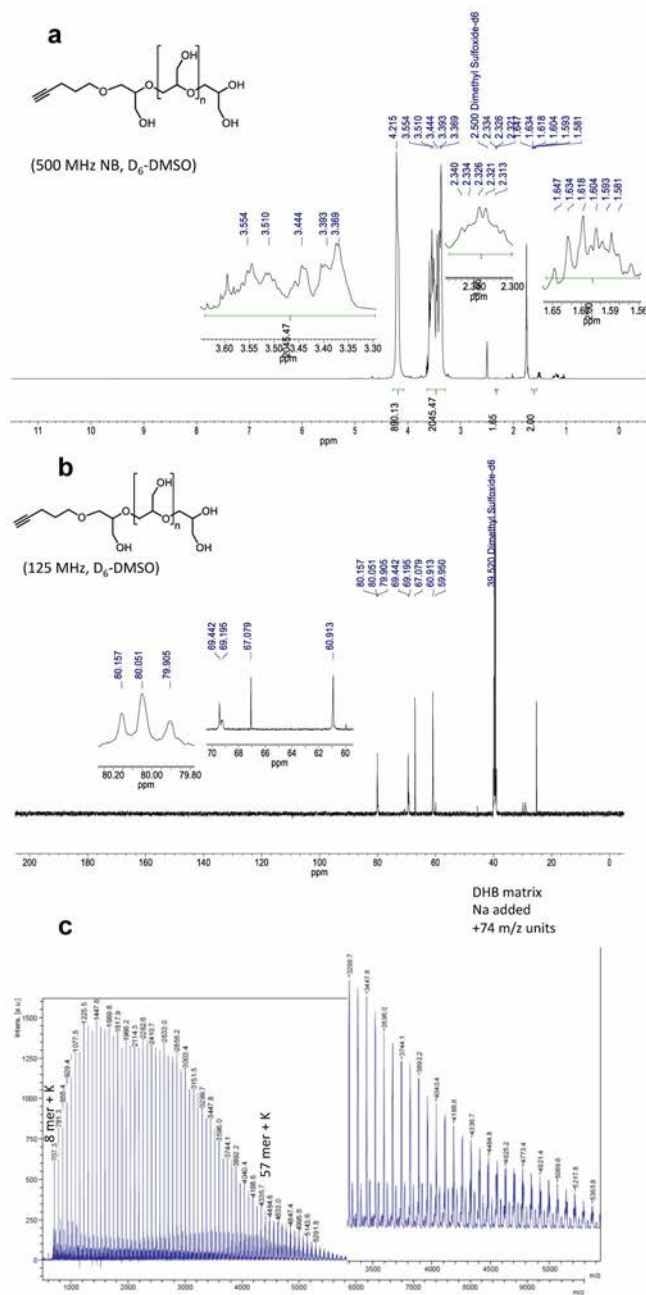

**Figure S6.** Characterization of  $LPG_{3k}$  by (a)  $^1H$  NMR, (b)  $^{13}C$  NMR, and (c) MALDI-TOF.  $LPG_{3k}$  represents LPG with MW of  $\sim 3,000$  g/mol.  $^1H$  NMR (500 MHz,  $DMSO-d_6$ )  $\delta$  4.29 – 4.11 (m, 1044H), 3.62 – 3.32 (m, 1897H), 2.32 (td,  $J = 6.9, 3.0$  Hz, 1H), 1.65 – 1.58 (m, 2H).  $^{13}C$  NMR (126 MHz,  $DMSO-d_6$ )  $\delta$  80.16, 80.05, 79.91, 69.45, 69.29, 67.08, 60.92, 59.95, 40.02, 39.94, 39.86, 39.78, 39.69, 39.60, 39.52, 39.35, 39.27, 39.19, 39.02. MS (MALDI)  $\sim 3000$  m/z, separation of 74 m/z units.

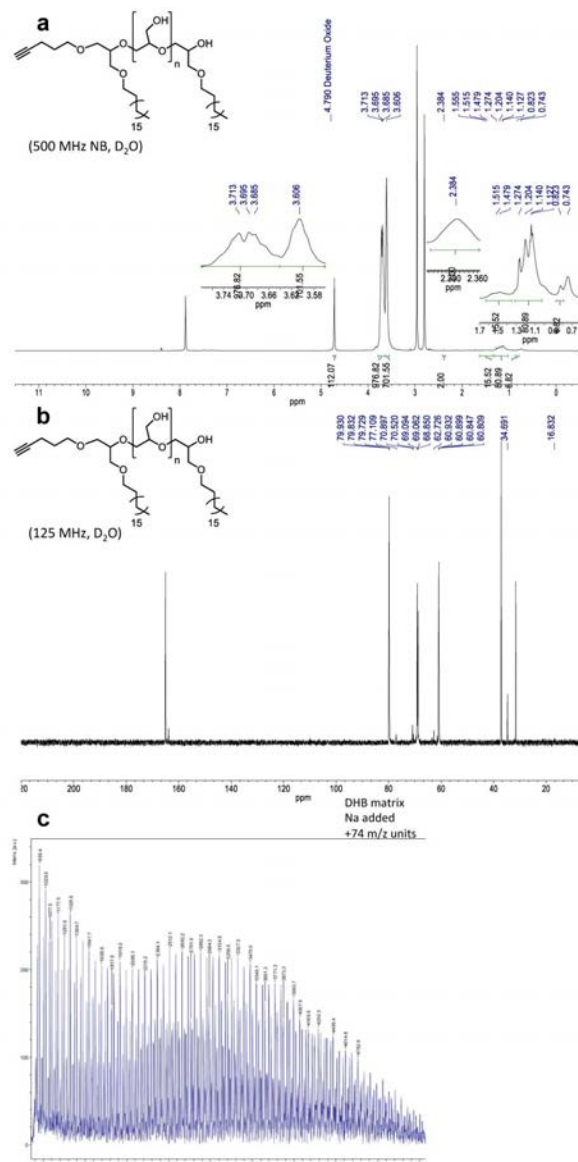

**Figure S7.** Characterization of LPG<sub>3k</sub>-g-C<sub>18</sub>(2) by (a) <sup>1</sup>H NMR, (b) <sup>13</sup>C NMR, and (c) MALDI-TOF. Protons of the C<sub>18</sub> chain are from 1-2 ppm in the <sup>1</sup>H NMR spectrum. LPG<sub>3k</sub>-g-C<sub>18</sub>(2) represents LPG (MW ~3,000 g/mol) substituted with 2 C<sub>18</sub> chains. <sup>1</sup>H NMR (500 MHz, deuterium oxide) δ 3.70 (dd, *J* = 15.5, 9.7 Hz, 977H), 3.61 (s, 702H), 2.38 (s, 2H), 1.52 (m, 16H), 1.24 – 0.98 (m, 80H), 0.77 (s, 6H). <sup>13</sup>C NMR (127 MHz, deuterium oxide) δ 79.93, 79.83, 79.73, 77.11, 70.90, 70.52, 69.09, 69.06, 68.85, 62.73, 60.93, 60.90, 60.85, 60.81, 37.08, 34.69, 31.57, 16.83. MS (MALDI) ~3500 m/z, separation of 74 m/z units.



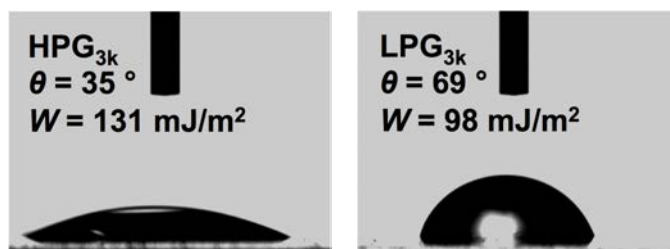

**Figure S8.** Contact angles and corresponding surface energies of water droplets on films of HPG<sub>3k</sub> and LPG<sub>3k</sub>.

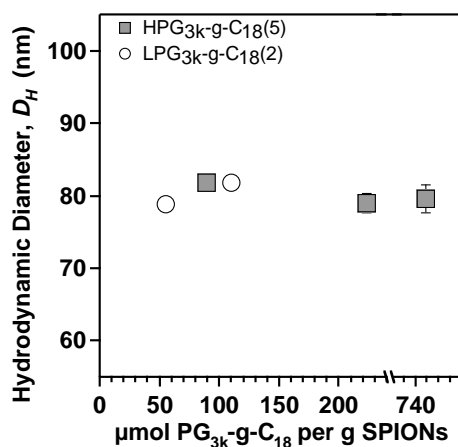

**Figure S9.** Z-average hydrodynamic diameter of SPION nanoclusters produced by various concentrations of HPG<sub>3k</sub>-g-C<sub>18</sub>(5) (■) and LPG<sub>3k</sub>-g-C<sub>18</sub>(2) (○). HPG<sub>3k</sub>-g-C<sub>18</sub>(5) and LPG<sub>3k</sub>-g-C<sub>18</sub>(2) represent HPG substituted with 5 C<sub>18</sub> chains and LPG substituted with 2 C<sub>18</sub> chains, respectively. Molecular weights of both HPG and LPG were 3,000 g/mol. Error bars, though partially obscured by data point markers, represent standard deviation of three measurements.

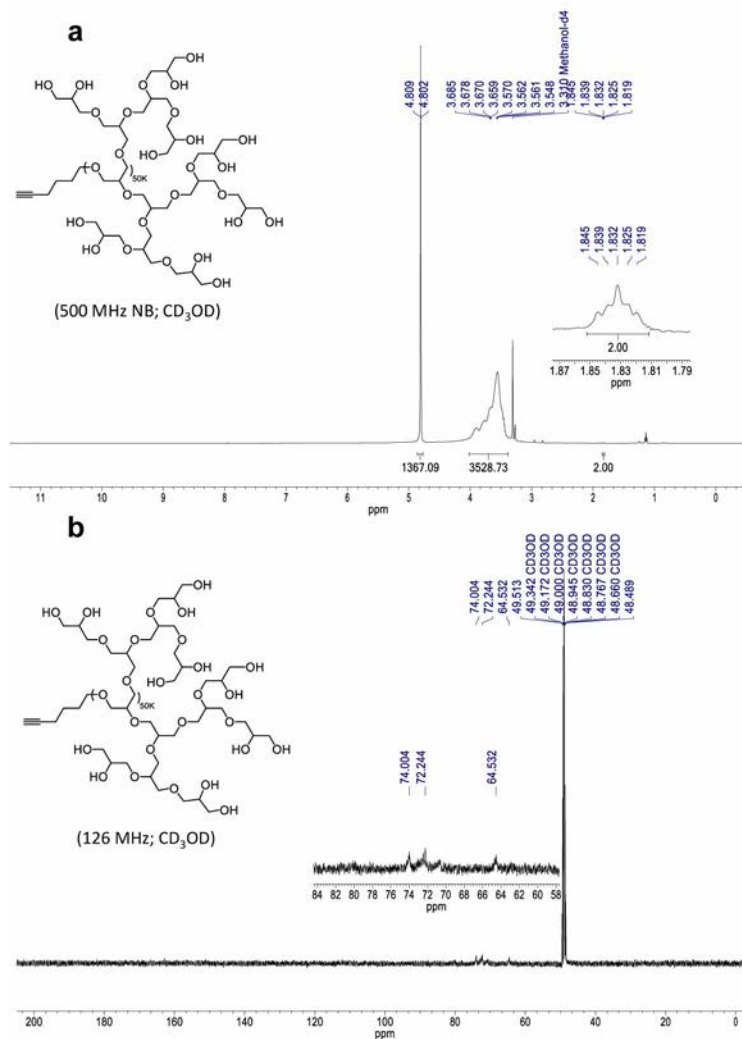

**Figure S10.** Characterization of HPG<sub>50k</sub> by (a) <sup>1</sup>H NMR and (b) <sup>13</sup>C NMR. HPG<sub>50k</sub> represents HPG with MW of ~50,000 g/mol. <sup>1</sup>H NMR (500 MHz, methanol-*d*<sub>4</sub>) δ 4.86 – 4.77 (m, 1367H), 4.02 – 3.39 (m, 3529H), 1.85 – 1.81 (m, 2H). <sup>13</sup>C NMR (126 MHz, methanol-*d*<sub>4</sub>) δ 74.00, 72.24, 64.53.

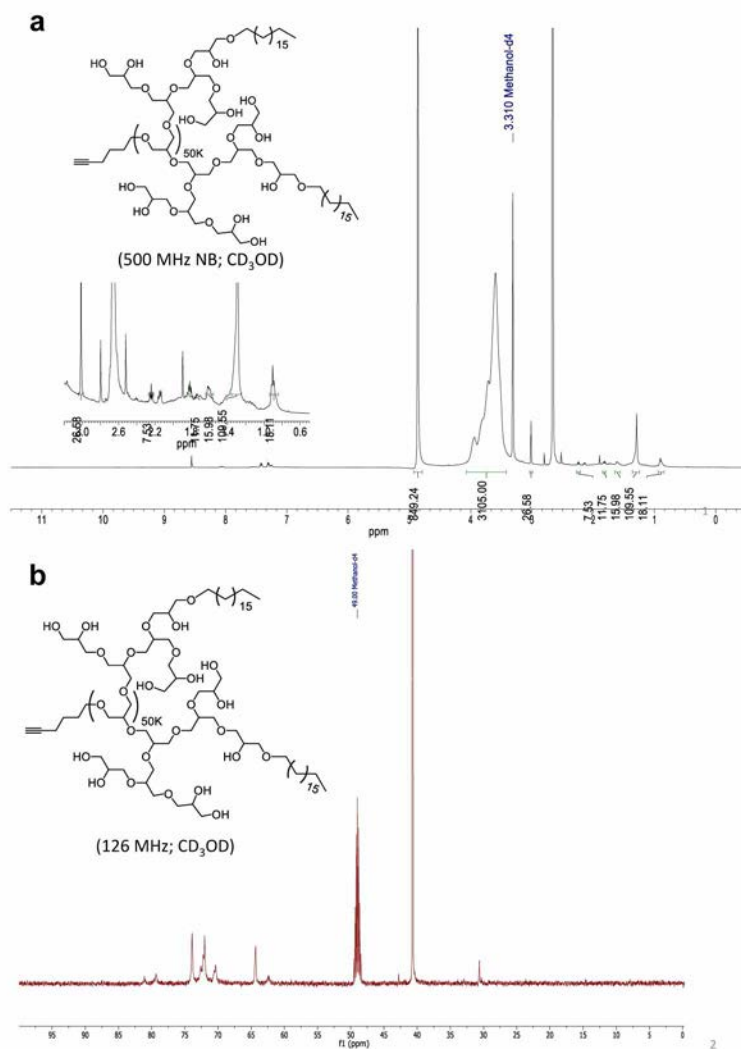

**Figure S11.** Characterization of HPG<sub>50k</sub>-g-C<sub>18</sub>(2) by **(a)** <sup>1</sup>H NMR and **(b)** <sup>13</sup>C NMR. Protons of the C<sub>18</sub> chain are from 1-2 ppm in the <sup>1</sup>H NMR spectrum. HPG<sub>50k</sub>-g-C<sub>18</sub>(2) represents HPG (MW ~50,000 g/mol) substituted with 2 C<sub>18</sub> chains. **<sup>1</sup>H NMR** (500 MHz, methanol-*d*<sub>4</sub>) δ 4.88 (s, 849H), 4.10 – 3.37 (m, 3105H), 3.03 (d, *J* = 3.0 Hz, 26H), 2.26 (t, *J* = 7.3 Hz, 8H), 1.88 – 1.78 (m, 12H), 1.67 – 1.56 (m, 16H), 1.32 (d, *J* = 9.5 Hz, 110H), 0.91 (dt, *J* = 10.0, 6.0 Hz, 18H). **<sup>13</sup>C NMR** (126 MHz, methanol-*d*<sub>4</sub>) δ 78.69, 72.84, 71.25, 71.04, 69.49, 63.36, 47.91, 47.84, 47.74, 47.56, 47.45, 47.39, 41.44, 39.28, 29.59.

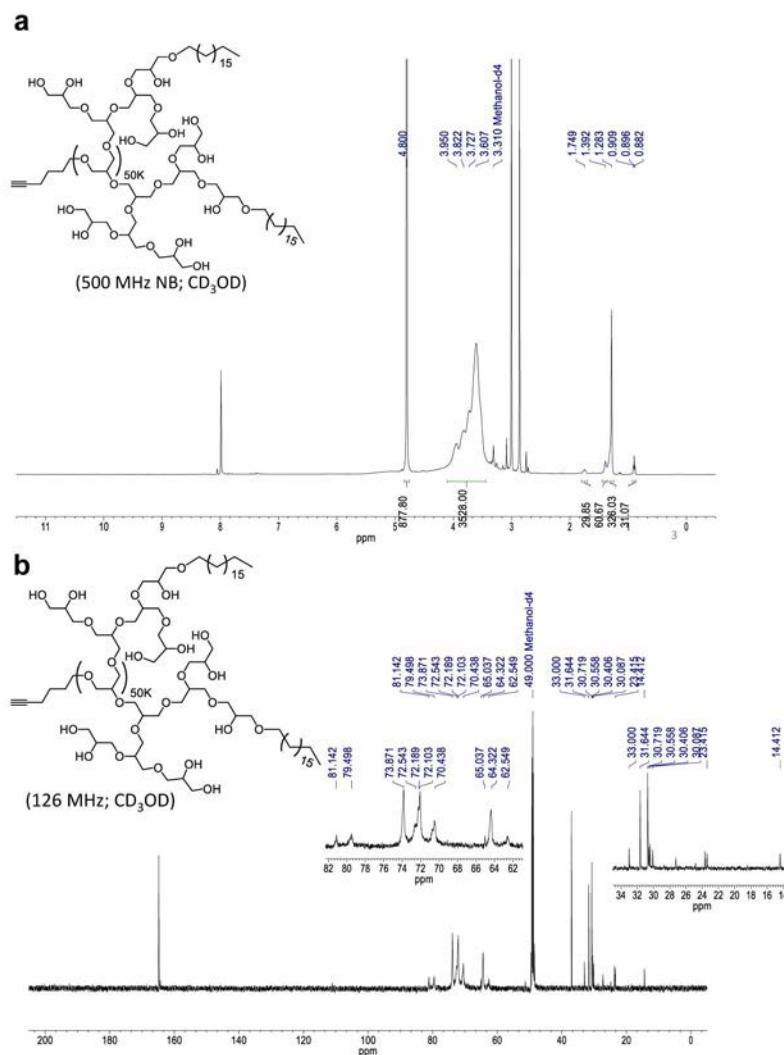

**Figure S12.** Characterization of HPG<sub>50k</sub>-g-C<sub>18</sub>(10) by (a) <sup>1</sup>H NMR and (b) <sup>13</sup>C NMR.

Protons of the C<sub>18</sub> chain are from 1-2 ppm in the <sup>1</sup>H NMR spectrum. HPG<sub>50k</sub>-g-C<sub>18</sub>(10) represents HPG (MW ~50,000 g/mol) substituted with 10 C<sub>18</sub> chains. **<sup>1</sup>H NMR** (500 MHz, methanol-*d*<sub>4</sub>) δ 4.80 (s, 878H), 3.95 – 3.61 (m, 3528H), 1.75 (dd, *J* = 10.9, 5.9 Hz, 30H), 1.40 (d, *J* = 5.7 Hz, 60H), 1.28 (s, 326H), 0.91 (t, *J* = 6.7 Hz, 31H). **<sup>13</sup>C NMR** (126 MHz, methanol-*d*<sub>4</sub>) δ 81.14, 79.50, 73.87, 72.54, 72.19, 72.10, 70.44, 65.04, 64.32, 62.55, 30.00, 31.64, 30.72, 30.56, 30.41, 30.09, 23.42, 14.41.

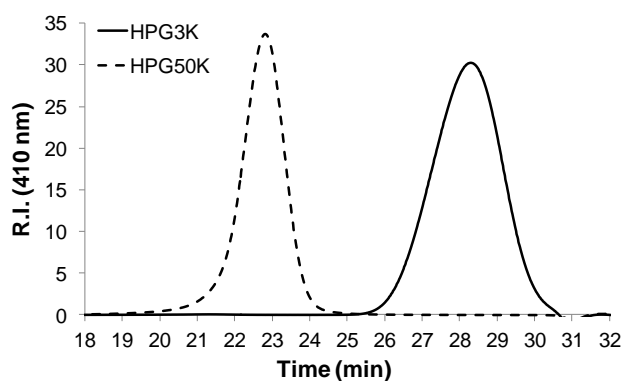

| Compounds Synthesized | SEC DMF MW <sup>a</sup>  | PDI  |
|-----------------------|--------------------------|------|
| HPG <sub>3k</sub>     | 28.28 min<br>(3019 MW)   | 1.20 |
| HPG <sub>50k</sub>    | 22.80 min<br>(46,025 MW) | 1.46 |

<sup>a</sup> PEG standards

**Figure S13.** Characterization of molecular weights of HPG<sub>3k</sub> and HPG<sub>50k</sub> by GPC. The molecular weight of HPG<sub>3k</sub> is in agreement with that determined by MALDI-TOF.

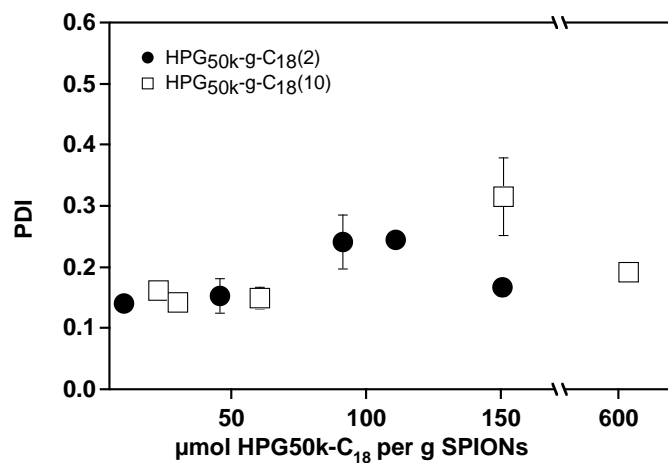

**Figure S14.** Polydispersity index (PDI) for the size-tunable clusters shown in Figure 2 of the text. Data are the average of three replicate measurements, with error bars representing standard deviation partially obscured by data point markers.

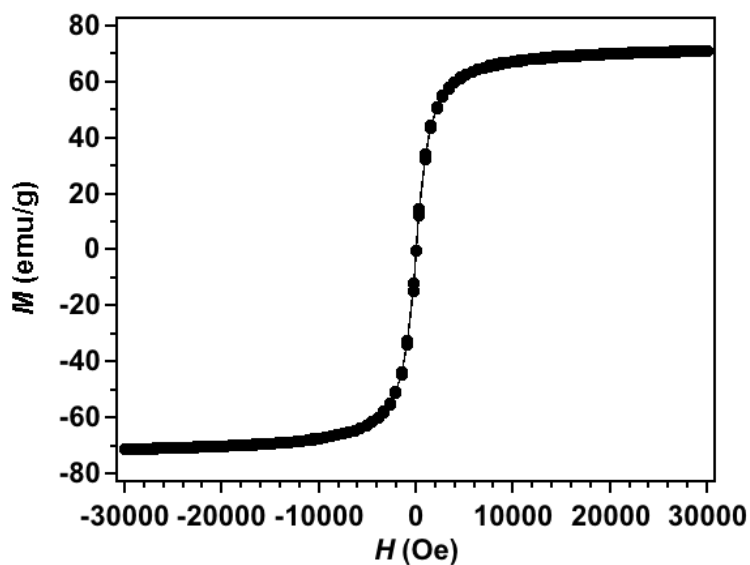

**Figure S15.** Magnetization curve of oleic acid-capped SPIONs at 300 K. A saturation magnetization,  $M_s$ , of 71 emu/g, determined from the plateau of the magnetization curve, was used to estimate theoretical maximum relaxivity in Eq. (3) of the text.

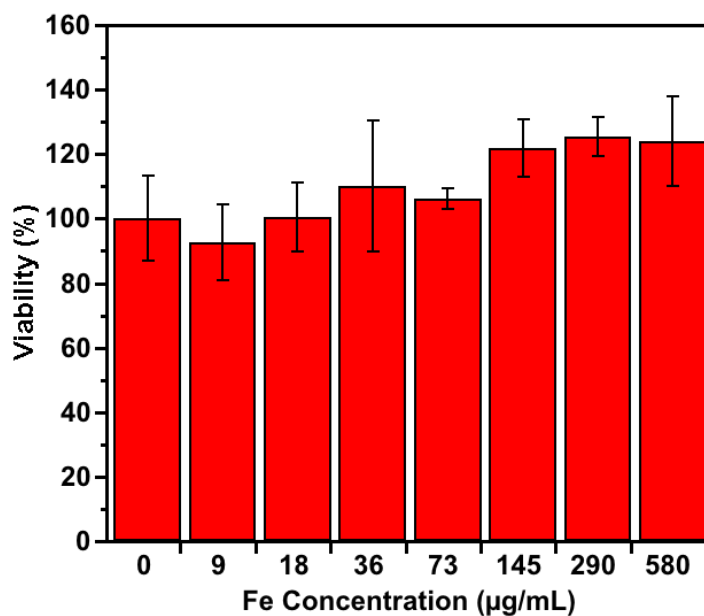

**Figure S16.** MTT assay to assess effects of HPG-SPION nanoclusters on metabolic activity of C166 endothelial cells. Percent viability was determined by normalization of absorbance values after blank subtraction to that of a control group of cells incubated without HPG-SPIONs. The concentration of Fe in the cell culture media was varied by altering the mass of SPION clusters. Values are the average of 3 replicates and error bars represent standard deviation.

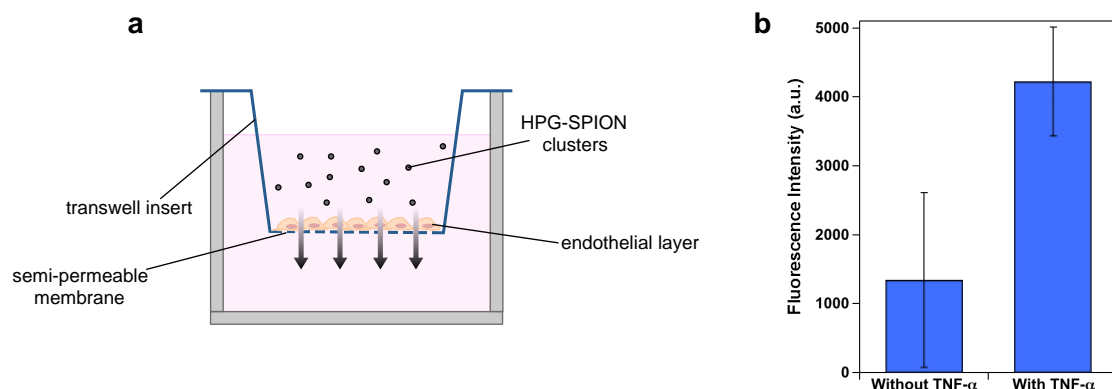

**Figure S17.** Endothelial transwell migration assay. **(a)** Schematic of the transwell insert. **(b)** Fluorescence intensity of the receiving well after incubation of FITC-labeled HPG-SPIONs and C166 cells with and without exposure to inflammation-inducing TNF- $\alpha$ . The diffusion of HPG-SPION nanoclusters was more than 3-fold higher through the endothelial layer exposed to TNF- $\alpha$ . Error bars represent standard deviation of three replicates.

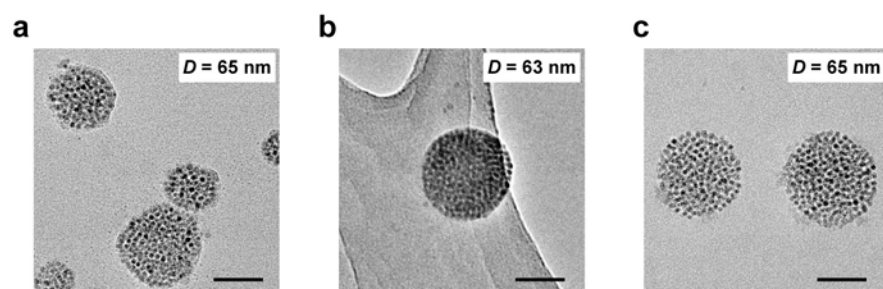

**Figure S18.** TEM micrographs of HPG-SPIONs before and after incubation with 50% human serum in PBS. The HPG-SPIONs with a hydrodynamic diameter of 122 nm and relaxivity of  $719 \text{ mM}^{-1} \text{ s}^{-1}$  were analyzed, and average core diameter is indicated on each figure. **(a)** TEM and **(b)** cryo-TEM images of the SPION clusters before serum incubation. **(c)** After incubation with 50% human serum in PBS for 2 h at 37 °C, the morphology and size remained unchanged, according to TEM micrographs. Scale bars represent 50 nm.



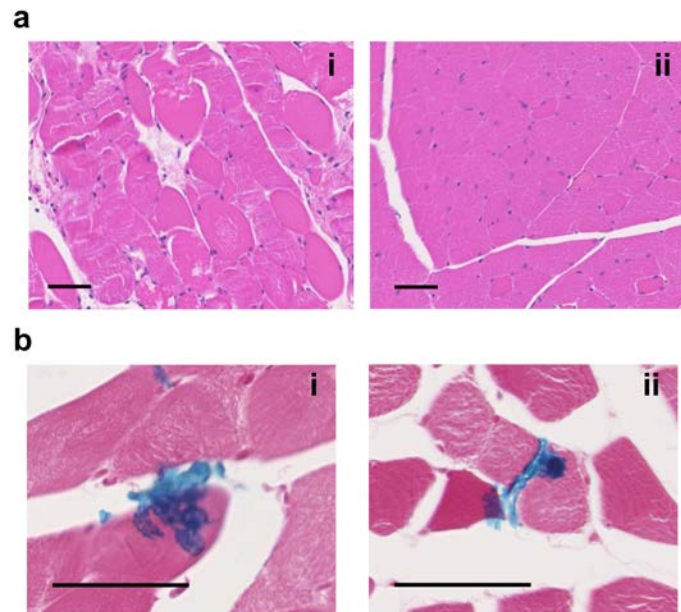

**Figure S19.** Histological analysis of the hindlimb ischemia model. **(a)** H&E staining of (i) the thigh of the ischemic left hindlimb, indicating tissue damage as a result of ischemia and (ii) the thigh of the uninjured, right hindlimb. **(b)** Prussian blue staining of the left, ischemic hindlimb sections containing (i) HPG-SPION nanoclusters and (ii) unclustered SPIONS, indicating the presence of contrast agent in both cases. In all figures, scale bars represent 50  $\mu\text{m}$ .
